# Supplementary material for: Proteomic landscape of SARS-CoV-2– and MERS-CoV–infected primary human renal epithelial cells
Source: Life Sci Alliance. 2022 Feb 2;5(5):e202201371. doi: 10.26508/lsa.202201371 (PMC8814637; doi:10.26508/lsa.202201371)
Supplement: Supplementary file 2 [file LSA-2022-01371_TableS2.xlsx]

## Sheet: Table Information
Supplementary Table 2
Tables showing the top 100 proteins with translation profiles mimicking the average viral protein translation profile. See Fig. 3 A-B, Fig. 4A
MERS-CoV	7 viral proteins detected in the translatome
SARS-CoV-2	5 viral proteins detected in the translatome
Z-score average of all quantified viral proteins was used as a reference.
Distance	Pearson Correlation
Profile q-value	FDR
Table S2. List of top 100 host proteins following viral translation upon infection of PTC and DTC with either SARS-CoV-2 or MERS-CoV (Fig. 3A). Z-score average of the abundances of all quantified viral protein across all time points for both control and infected replicates (n = =3) was used as a reference profile. Pearson correlation was used as a measure of distance and false discovery rateFDR a…

## Sheet: DTC_MERS-CoV_107
Distance	Profile q-value	Accession	Gene Symbol
0.00825014	0	K9N4V7	N
0.0275461	0	K9N7A1	M
0.0816043	0	K9N643	ns3c;orf4b
0.0896908	0	K9N5Q8	S
0.11579	0.654	K9N4V0	ns3b;orf4a
0.27315	0.725833	Q13322	GRB10
0.284537	0.722857	K9N7C7	orf1ab
0.291057	1	P62906	RPL10A
0.329992	1	P50336	PPOX
0.344064	1	Q9UL46	PSME2
0.353229	1	O60684	KPNA6
0.354864	1	Q13823	GNL2
0.360255	1	Q9BVP2	GNL3
0.364986	1	O15155	BET1
0.36914	1	P16455	MGMT
0.370008	1	Q9UBE0	SAE1
0.370935	1	P26373	RPL13
0.374408	1	Q16513	PKN2
0.375925	1	Q9H2K0	MTIF3
0.378353	1	Q9BXK5	BCL2L13
0.378523	1	Q9HB90	RRAGC
0.379963	1	P45985	MAP2K4
0.381406	1	Q96JJ7	TMX3
0.382238	1	Q8NFH5	NUP35
0.382749	1	Q9BVC6	TMEM109
0.384389	1	Q6ICB0	DESI1
0.385117	1	P19174	PLCG1
0.387539	1	Q96PK6	RBM14;RBM14-RBM4
0.391126	1	Q02040	AKAP17A
0.39189	1	Q68E01	INTS3
0.39532	1	Q9NZJ7	MTCH1
0.397111	1	Q8IWZ8	SUGP1
0.399435	1	Q8IUF1	CBWD2
0.399684	1	P28715	ERCC5
0.401283	1	Q8WWM7	ATXN2L
0.401378	1	P52788	SMS
0.404361	1	Q4J6C6	PREPL
0.407681	1	Q9BT78	COPS4
0.408513	1	Q96JY6	PDLIM2
0.408545	1	Q5T2R2	PDSS1
0.409301	1	P09012	SNRPA
0.410523	1	Q7Z6M4	MTERFD2;MTERF4
0.41082	1	Q96L91	EP400
0.413533	1	Q16773	CCBL1;KYAT1
0.416731	1	Q13310	PABPC4
0.419128	1	Q9BXW7	CECR5;HDHD5
0.420666	1	Q8WXX5	DNAJC9
0.422604	1	Q9H2P0	ADNP
0.424468	1	P51610	HCFC1
0.425219	1	Q86UV5	USP48
0.425389	1	Q16555	DPYSL2
0.42708	1	K9N796	ns3a;orf3
0.427871	1	P08581	MET
0.430209	1	Q9BQS8	FYCO1
0.432136	1	Q9NTZ6	RBM12
0.432598	1	P61106	RAB14
0.434485	1	O15013	ARHGEF10
0.434884	1	Q9HCN8	SDF2L1
0.434968	1	Q96AX1	VPS33A
0.435522	1	P30838	ALDH3A1
0.435868	1	Q6P3X3	TTC27
0.43766	1	Q9Y2L1	DIS3
0.437723	1	Q86X55	CARM1
0.439609	1	O14641	DVL2
0.43987	1	P08133	ANXA6
0.440823	1	P61970	NUTF2
0.441084	1	Q9UPU5	USP24
0.441482	1	Q92615	LARP4B
0.442156	1	Q8TAE8	GADD45GIP1
0.442545	1	Q9BUB7	TMEM70
0.442753	1	Q7L0Y3	TRMT10C
0.443365	1	Q96DA6	DNAJC19
0.444176	1	Q6VN20	RANBP10
0.445129	1	O00151	PDLIM1
0.445574	1	Q9BZ29	DOCK9
0.445606	1	Q5SY16	NOL9
0.445912	1	Q96JC1	VPS39
0.44599	1	O75128	COBL
0.446735	1	Q8WV60	PTCD2
0.446963	1	O60828	PQBP1
0.448051	1	P23526	AHCY
0.449484	1	Q7Z4H3	HDDC2
0.4503	1	Q9BYD3	MRPL4
0.452517	1	Q7L1W4	LRRC8D
0.453105	1	Q9NTX5	ECHDC1
0.454112	1	Q9NVH1	DNAJC11
0.454654	1	Q7Z3B4	NUP54
0.454694	1	Q8TAQ2	SMARCC2
0.45588	1	Q15058	KIF14
0.4559	1	Q10471	GALNT2
0.456376	1	O43310	CTIF
0.456631	1	Q8IXI2	RHOT1
0.457369	1	O14744	PRMT5
0.457764	1	Q9H553	ALG2
0.460199	1	P56524	HDAC4
0.460309	1	Q01780	EXOSC10
0.461027	1	Q8NF91	SYNE1
0.461598	1	Q9BTT0	ANP32E
0.462421	1	P43897	TSFM
0.463394	1	P42771	CDKN2A
0.46344	1	Q9Y3P9	RABGAP1
0.463611	1	Q5JRX3	PITRM1
0.463906	1	Q9UBB5	MBD2
0.463942	1	Q9P2T1	GMPR2
0.463971	1	P10176	COX8A
0.464705	1	Q5T9A4	ATAD3B
0.464707	1	O60504	SORBS3

## Sheet: PTC_MERS-CoV_107
Distance	Profile q-value	Accession	Gene Symbol
0.0407238	0	K9N4V7	N
0.052057	0	K9N5Q8	S
0.0705093	0.00166667	K9N643	ns3c;orf4b
0.096118	0.0025	K9N7A1	M
0.138988	0.407	K9N4V0	ns3b;orf4a
0.270266	0.3525	K9N7C7	orf1ab
0.271391	1	Q13322	GRB10
0.399327	1	O60828	PQBP1
0.400027	1	P56937	HSD17B7
0.40621	1	Q8NCM8	DYNC2H1
0.415727	1	Q6P9B6	KIAA1609;TLDC1
0.437031	1	Q15526	SURF1
0.43977	1	K9N796	ns3a;orf3
0.440072	1	P00519	ABL1
0.44743	1	P09012	SNRPA
0.466222	1	O95479	H6PD
0.47362	1	Q9H0H0	INTS2
0.475544	1	Q9NZ09	UBAP1
0.47699	1	Q01081	U2AF1;LOC102724594;U2AF1L5
0.485922	1	Q9H0W9	C11orf54
0.48632	1	Q9C0B0	UNK
0.488681	1	P78330	PSPH
0.489981	1	Q99590	SCAF11
0.496483	1	Q9HBH1	PDF
0.498047	1	Q8NFH5	NUP35
0.499028	1	P01130	LDLR
0.505481	1	O00429	DNM1L
0.509603	1	Q3YEC7	RABL6
0.510614	1	Q8NFH4	NUP37
0.511023	1	P24752	ACAT1
0.513081	1	Q8TAE8	GADD45GIP1
0.513505	1	O60294	LCMT2
0.513823	1	O43149	ZZEF1
0.514396	1	Q92581	SLC9A6
0.514396	1	Q9UBB5	MBD2
0.514963	1	O60884	DNAJA2
0.515119	1	P20591	MX1
0.518044	1	O14744	PRMT5
0.520101	1	O94822	LTN1
0.520243	1	Q9BYD3	MRPL4
0.520798	1	Q9Y4P1	ATG4B
0.522468	1	O14777	NDC80
0.522912	1	O00194	RAB27B
0.523571	1	Q06546	GABPA
0.52449	1	O60244	MED14
0.524849	1	Q15287	RNPS1
0.525667	1	P49848	TAF6
0.528648	1	Q9HAV0	GNB4
0.528926	1	O95478	NSA2
0.529231	1	Q5T7V8	GORAB
0.531869	1	Q86Y37	CACUL1
0.534863	1	Q9NXV2	KCTD5
0.536015	1	Q9H900	ZWILCH
0.54052	1	Q8IWZ8	SUGP1
0.541795	1	O95822	MLYCD
0.542162	1	Q8WWV3	RTN4IP1
0.542188	1	Q9NWS0	PIH1D1
0.542206	1	Q9BTX7	TTPAL
0.543069	1	P28715	ERCC5
0.545478	1	A0A1B0GW15
0.546877	1	Q8IWZ3	ANKHD1;ANKHD1-EIF4EBP3
0.547228	1	P31943	HNRNPH1
0.548467	1	Q9H7Z7	PTGES2
0.549077	1	Q8NFD5	ARID1B
0.550398	1	Q9UPM8	AP4E1
0.551398	1	Q8NEW0	SLC30A7
0.551616	1	Q96HW7	INTS4
0.552476	1	P83436	COG7
0.553503	1	Q9UBX3	SLC25A10
0.554285	1	P35251	RFC1
0.554486	1	Q8IZ52	CHPF
0.556175	1	Q9NS87	KIF15
0.556215	1	Q7L8L6	FASTKD5
0.556686	1	Q5T3J3	LRIF1
0.558265	1	Q00536	CDK16
0.558327	1	Q9BU89	DOHH
0.558453	1	P36776	LONP1
0.558474	1	Q14739	LBR
0.558807	1	Q8N2M8	CLASRP
0.559507	1	Q13509	TUBB3
0.560219	1	Q5VT79	ANXA8L1
0.560234	1	P48634	PRRC2A
0.560513	1	Q9BUF5	TUBB6
0.561158	1	Q13506	NAB1
0.561479	1	Q8IUH4	ZDHHC13
0.562888	1	O15372	EIF3H
0.563321	1	P49327	FASN
0.565274	1	Q9UL46	PSME2
0.565559	1	Q9Y2B0	CNPY2
0.565704	1	Q6JQN1	ACAD10
0.566259	1	Q8IXQ6	PARP9
0.566698	1	Q96P48	ARAP1
0.567579	1	Q15771	RAB30
0.569343	1	O15258	RER1
0.569832	1	Q8IZL8	PELP1
0.570655	1	Q9H8Y8	GORASP2
0.571488	1	Q11201	ST3GAL1
0.571739	1	P50148	GNAQ
0.571766	1	P24534	EEF1B2
0.571786	1	P50747	HLCS
0.572463	1	P51114	FXR1
0.573609	1	Q7Z5K2	WAPAL;WAPL
0.573816	1	Q9UKX7	NUP50
0.574325	1	Q8TEY7	USP33
0.574407	1	P86790	CCZ1;CCZ1B
0.574715	1	Q96C86	DCPS
0.57536	1	Q9NSE4	IARS2

## Sheet: DTC_SARS-CoV-2_105
Distance	Profile q-value	Accession	Gene Symbol
0.0080451	0	P0DTC3	P3a
0.0123832	0	P0DTC2	S
0.0202393	0	P0DTC9	N
0.0515429	0	P32455	GBP1
0.0557603	0	Q63HN8	RNF213
0.0571879	0.000833333	P0DTC5	M
0.0642697	0.000714286	Q9Y5A7	NUB1
0.0658053	0.000625	Q9BQE5	APOL2
0.0710454	0.000555556	Q14258	TRIM25
0.0744993	0.001	Q9H223	EHD4
0.0803537	0.00181818	P0DTD2	P9b
0.0893846	0.00166667	Q460N5	PARP14
0.0921667	0.00423077	Q9Y3Z3	SAMHD1
0.101086	0.00392857	P29590	PML
0.101101	0.004	Q9BYX4	IFIH1
0.101807	0.00375	P23497	SP100
0.102394	0.00352941	O95786	DDX58
0.103075	0.00416667	Q08AF3	SLFN5
0.106179	0.00421053	P52630	STAT2
0.109357	0.004	P50591	TNFSF10
0.109471	0.00380952	Q96CV9	OPTN
0.113068	0.00931818	P09914	IFIT1
0.140461	0.00913043	P40306	PSMB10
0.141285	0.01	Q8IZH2	XRN1
0.144208	0.0106	Q9Y2V7	COG6
0.147348	0.0105769	Q8WXG1	RSAD2
0.149276	0.0159259	Q15646	OASL
0.162883	0.0183929	Q03518	TAP1
0.169447	0.017931	Q5K651	SAMD9
0.170018	0.0173333	Q99836	MYD88
0.170104	0.0195161	P28838	LAP3
0.174637	0.0189062	Q9C035	TRIM5
0.174752	0.0218182	P20591	MX1
0.179477	0.0226471	O00214	LGALS8
0.181529	0.0227143	P09913	IFIT2
0.182452	0.0245833	P80217	IFI35
0.187633	0.0260811	Q03519	TAP2
0.191836	0.0257895	P42224	STAT1
0.19247	0.0264103	Q92930	RAB8B
0.194476	0.027875	Q8IY21	DDX60
0.19713	0.027561	Q13287	NMI
0.197643	0.0298809	Q5H9U9	DDX60L
0.201874	0.0309302	P28065	PSMB9
0.204183	0.0357954	Q9BYK8	HELZ2
0.210357	0.0394444	P23381	WARS
0.213775	0.0406522	O14879	IFIT3
0.215305	0.056383	O15121	DEGS1
0.22786	0.0602083	Q9NRL2	BAZ1A
0.232206	0.060102	Q00978	IRF9
0.233262	0.0669	P19525	EIF2AK2
0.2388	0.0658824	Q9Y6U3	SCIN
0.23891	0.0657692	P05161	ISG15
0.239655	0.0660377	P28062	PSMB8
0.2408	0.0788889	Q9BT40	INPP5K
0.249821	0.0867273	Q8TCS8	PNPT1
0.255348	0.0857143	Q08722	CD47
0.255797	0.091579	Q15628	TRADD
0.25997	0.102241	Q8IXQ6	PARP9
0.266319	0.106102	Q96J88	EPSTI1
0.269031	0.118083	P54920	NAPA
0.274153	0.118771	Q14108	SCARB2
0.275008	0.12379	Q9UIQ6	LNPEP
0.278127	0.127698	Q9H9G7	AGO3;EIF2C3
0.280742	0.138281	Q16666	IFI16
0.286867	0.137615	Q96AZ6	ISG20
0.287316	0.139015	Q06323	PSME1
0.288406	0.142761	Q96QD9	FYTTD1
0.290894	0.165368	P55210	CASP7
0.299604	0.169855	P13747
0.302161	0.174214	P30281	CCND3
0.304366	0.173099	O15533	TAPBP
0.304698	0.173542	Q9P2E9
0.305752	0.172329	Q9Y6K5	OAS3
0.306094	0.171757	Q13325	IFIT5
0.306671	0.173333	Q92692	PVRL2;NECTIN2
0.307865	0.185461	Q9UL46	PSME2
0.31254	0.219026	Q14142	TRIM14
0.323168	0.221346	Q8NHU6	TDRD7
0.324384	0.218861	Q8WYA6	CTNNBL1
0.324585	0.222312	Q9H0P0	NT5C3;NT5C3A
0.326354	0.235124	P19971	TYMP;SCO2
0.331039	0.238537	Q8NB16	MLKL
0.332769	0.253012	Q9HCE1	MOV10
0.338027	0.25369	Q9Y6L7	TLL2
0.339111	0.252647	P09543	CNP
0.339672	0.261221	Q8IYM9	TRIM22
0.342451	0.277586	O00178	GTPBP1
0.347659	0.27483	Q9NUQ6	SPATS2L
0.347771	0.275506	Q9NZQ7	CD274
0.348612	0.282111	Q8IV50	LYSMD2
0.350897	0.300824	O96000	NDUFB10
0.35545	0.313967	O15162	PLSCR1
0.359069	0.332742	Q9P2E3	ZNFX1
0.364175	0.335213	Q9H0J9	PARP12
0.365508	0.341263	Q9HB58	SP110
0.367637	0.356615	P19474	TRIM21
0.371741	0.361082	O75888	TNFSF13
0.373684	0.400357	Q9NRZ7	AGPAT3
0.381845	0.405909	P29728	OAS2
0.383774	0.41185	O15270	SPTLC2
0.385561	0.420396	O00743	PPP6C
0.388001	0.453382	Q96D53	ADCK4;COQ8B
0.394693	0.451116	Q96N11	C7orf26
0.395244	0.493029	Q99538	LGMN
0.402738	0.499	P49768	PSEN1

## Sheet: PTC_SARS-CoV-2_105
Distance	Profile q-value	Accession	Gene Symbol
0.0128357	0	P0DTC9	N
0.0153876	0	Q14258	TRIM25
0.0182267	0.00166667	P0DTC2	S
0.022363	0.00125	P0DTC3	P3a
0.0264624	0.003	Q63HN8	RNF213
0.0475807	0.0025	Q460N5	PARP14
0.0531181	0.00214286	P52630	STAT2
0.0533873	0.001875	P32455	GBP1
0.0534487	0.00166667	P0DTD2	P9b
0.0546194	0.0015	P0DTC5	M
0.0582064	0.00136364	Q9BQE5	APOL2
0.0586188	0.00208333	Q99836	MYD88
0.0656249	0.00192308	Q9BYX4	IFIH1
0.0656555	0.00178571	Q8WXG1	RSAD2
0.0682471	0.00166667	P28838	LAP3
0.0690376	0.001875	Q9Y3Z3	SAMHD1
0.0705832	0.00176471	Q03518	TAP1
0.0706538	0.00166667	P29590	PML
0.071137	0.00157895	Q9P2E9
0.07545	0.0015	Q5H9U9	DDX60L
0.0771263	0.00190476	Q14108	SCARB2
0.0870819	0.00181818	P50591	TNFSF10
0.0872968	0.00173913	P28065	PSMB9
0.0912434	0.001875	O95786	DDX58
0.0921756	0.0018	Q9H223	EHD4
0.0926293	0.00173077	P23381	WARS
0.0926385	0.00166667	Q5K651	SAMD9
0.0947777	0.00196429	P09914	IFIT1
0.097719	0.00189655	P40306	PSMB10
0.102989	0.002	Q9BYK8	HELZ2
0.104499	0.00258064	Q8TCS8	PNPT1
0.112097	0.0028125	Q9Y5A7	NUB1
0.113703	0.00272727	Q8IZH2	XRN1
0.114863	0.00264706	Q9C035	TRIM5
0.115637	0.00257143	Q13287	NMI
0.115744	0.00277778	Q96CV9	OPTN
0.122087	0.0027027	Q08AF3	SLFN5
0.122137	0.00289474	P42224	STAT1
0.125561	0.00294872	Q9H0P0	NT5C3;NT5C3A
0.12817	0.002875	Q15646	OASL
0.128397	0.00317073	P09913	IFIT2
0.133316	0.00333333	Q03519	TAP2
0.13504	0.00348837	O15162	PLSCR1
0.137761	0.00375	P19971	TYMP;SCO2
0.138771	0.00366667	O14879	IFIT3
0.139828	0.00391304	Q08722	CD47
0.142861	0.00425532	Q9H0J9	PARP12
0.145696	0.005625	P20591	MX1
0.156892	0.00581633	P19525	EIF2AK2
0.15741	0.0059	Q8IY21	DDX60
0.158167	0.00578431	Q9NZQ7	CD274
0.158322	0.00596154	Q9Y2V7	COG6
0.161607	0.00613208	Q9Y6U3	SCIN
0.163291	0.00694444	Q96QD9	FYTTD1
0.167495	0.007	P23497	SP100
0.168549	0.00696429	Q9NZ08	ERAP1
0.170193	0.00798246	Q9NRL2	BAZ1A
0.172962	0.00793103	Q8NB16	MLKL
0.173984	0.00830509	P05161	ISG15
0.175555	0.00966667	Q16666	IFI16
0.18333	0.0101639	Q9NUQ6	SPATS2L
0.185854	0.0104032	O00214	LGALS8
0.187294	0.0113492	P80217	IFI35
0.192848	0.0113281	P28062	PSMB8
0.193359	0.0152308	Q96J88	EPSTI1
0.205231	0.0156061	Q13325	IFIT5
0.207771	0.0174627	Q92930	RAB8B
0.212987	0.0175735	Q8IYM9	TRIM22
0.213994	0.0204348	Q8IXQ6	PARP9
0.21977	0.0201429	Q9Y2J2	EPB41L3
0.220008	0.0221127	Q99538	LGMN
0.223824	0.0223611	P09543	CNP
0.225678	0.0226712	O95793	STAU1
0.226899	0.0289865	Q96AZ6	ISG20
0.238807	0.0307333	Q96RQ9	IL4I1
0.242984	0.0375658	Q9Y6K5	OAS3
0.253092	0.0412338	P0DJI8	SAA1
0.259144	0.0435897	P13747
0.263786	0.0443671	Q9H1C4	UNC93B1
0.265103	0.05075	Q8N1G2	CMTR1;FTSJD2
0.27367	0.0548148	Q9BX59	TAPBPL
0.278711	0.0551829	P29728	OAS2
0.279366	0.0557229	Q13557	CAMK2D
0.280597	0.0585714	P19474	TRIM21
0.284745	0.0606471	P49441	INPP1
0.287429	0.0647674	O60934	NBN
0.292261	0.069023	P54920	NAPA
0.296745	0.071875	Q9Y508	RNF114
0.299997	0.0739326	Q9UHI6	DDX20
0.301748	0.0738889	Q9BZE1	MRPL37
0.302358	0.0766484	P29466	CASP1
0.305233	0.0759239	O14545	TRAFD1
0.305367	0.0767204	Q08380	LGALS3BP
0.306826	0.0769681	Q92692	PVRL2;NECTIN2
0.307433	0.0817895	P09758	TACSTD2
0.311015	0.0836979	O00468
0.312749	0.0909278	Q9HCE1	MOV10
0.317824	0.0987245	Q12899	TRIM26
0.323582	0.103081	Q9P2E3	ZNFX1
0.326529	0.11945	Q9H3M7	TXNIP;LOC101060503
0.336368	0.139505	Q9Y371	SH3GLB1
0.34652	0.162206	O75113	N4BP1
0.356457	0.164757	Q06323	PSME1
0.358067	0.163413	P10321	HLA-C
0.358135	0.166381	Q86YS6	RAB43
