# Supplementary material for: Proteomic landscape of SARS-CoV-2– and MERS-CoV–infected primary human renal epithelial cells
Source: Life Sci Alliance. 2022 Feb 2;5(5):e202201371. doi: 10.26508/lsa.202201371 (PMC8814637; doi:10.26508/lsa.202201371)
Supplement: Supplementary file 4 [file LSA-2022-01371_TableS4.xlsx]

## Sheet: Table information
Supplementary Table 4
Gene ontology analysis performed on proteins mimicking viral protein translation profile in both proximal and distal tubular cells upon SARS-CoV-2 infection using Bingo plugin for Cytoscape.
	Table S4. Results of gene ontology analysis of the 75 host proteins that followed the SARS-CoV-2 viral profile in both PTC and DTC (Fig 4A). BiNGO plugin for Cytoscape was used for enrichment analysis. Overrepresentation was tested with Hypergeometric test using Benjamini & Hochberg false discovery rate correction and significance level cut-off of 0.05.

## Sheet: Fig.4A_75sharedproteins
Proteins mimicking viral profile in both SARS-CoV-2 infected PTCs and DTCs (Fig. 3B and Fig. 4A)
Protein Name	UniProt Accession
LGMN	Q99538
RRBP1	Q9P2E9
TAP2	Q03519
SP100	P23497
TAP1	Q03518
DDX60L	Q5H9U9
ZNFX1	Q9P2E3
ISG15	P05161
NAPA	P54920
LGALS8	O00214
FYTTD1	Q96QD9
SAMD9	Q5K651
WARS	P23381
COG6	Q9Y2V7
MX1	P20591
PARP12	Q9H0J9
IFIT1	P09914
DDX58	O95786
OASL	Q15646
IFIT2	P09913
APOL2	Q9BQE5
PSMB10	P40306
ISG20	Q96AZ6
CD274	Q9NZQ7
EHD4	Q9H223
OPTN	Q96CV9
PSME1	Q06323
PML	P29590
PARP14	Q460N5
TRIM21	P19474
PSMB8	P28062
PSMB9	P28065
TNFSF10	P50591
SCIN	Q9Y6U3
SCARB2	Q14108
IFI35	P80217
MYD88	Q99836
CNP	P09543
TRIM22	Q8IYM9
MOV10	Q9HCE1
BAZ1A	Q9NRL2
IFIT3	O14879
NT5C3A	Q9H0P0
RNF213	Q63HN8
GBP1	P32455
EPSTI1	Q96J88
TRIM25	Q14258
IFIT5	Q13325
RAB8B	Q92930
NUB1	Q9Y5A7
SAMHD1	Q9Y3Z3
NMI	Q13287
OAS2	P29728
LAP3	P28838
HELZ2	Q9BYK8
PVRL2	Q92692
SPATS2L	Q9NUQ6
XRN1	Q8IZH2
MLKL	Q8NB16
STAT1	P42224
EIF2AK2	P19525
PNPT1	Q8TCS8
TRIM5	Q9C035
TYMP	P19971
PARP9	Q8IXQ6
OAS3	Q9Y6K5
CD47	Q08722
HLA-E	P13747
DDX60	Q8IY21
RSAD2	Q8WXG1
IFI16	Q16666
SLFN5	Q08AF3
PLSCR1	O15162
IFIH1	Q9BYX4
STAT2	P52630

## Sheet: Fig.4A_BingoData
File created with bingo (c) on 13.08.2020 at 22:45:51
ontology: namespace
curator: bingo
Selected ontology file : bundle://136.0:1/data/GO_Biological_Process
Selected annotation file : bundle://136.0:1/data/H_sapiens_default
Discarded evidence codes :
Overrepresentation
Selected statistical test : Hypergeometric test
Selected correction : Benjamini & Hochberg False Discovery Rate (FDR) correction
Selected significance level : 0.05
Testing option : Use whole annotation as reference set
The selected cluster :
P52630	Q9BYX4	O15162	Q08AF3	Q16666	Q8WXG1	Q8IY21	P13747	Q13557	P0DTC3	Q08722	P0DTC5	Q9Y6K5	Q8IXQ6	P19971	O95793	Q9C035	P0DTC9	O00468	Q8TCS8	P19525	P42224	Q8IZH2	Q9NUQ6	P0DTD2	Q92692	Q9BYK8	P28838	P29728	Q13287	Q9Y3Z3	Q9Y5A7	Q92930	Q13325	Q14258	Q96J88	P32455	Q63HN8	O14879	Q9NRL2	Q9HCE1	Q8IYM9	P09543	Q99836	P80217	Q14108	Q9Y6U3	P50591	P28065	P28062
No annotations were retrieved for the following entities:
Q9H0J9	Q8IY21	P0DTC3	Q96J88	P0DTC5	P32455	Q63HN8	Q5K651	P0DTC9	O00214	Q9NUQ6	P0DTD2	P0DTC2	P29728	Q99836	Q5H9U9
GO-ID	p-value	corr p-value	x	n	X	N	Description	Genes in test set
9615	4.4332e-17	3.684e-14	15	142	64	14306	response to virus	P52630|Q9BYX4|O15162|O95786|Q14258|Q16666|Q8WXG1|Q9C035|P19525|P42224|Q8IYM9|P05161|Q96AZ6|Q9Y3Z3|P80217
51704	1.2188e-14	5.0642e-12	24	785	64	14306	multi-organism process	P52630|Q9BYX4|O15162|O95786|Q14258|Q16666|Q8WXG1|P28065|P28062|P29590|Q9C035|P19525|P42224|Q8IYM9|Q92692|P05161|Q9HB58|Q96AZ6|P40306|Q03518|Q9BQE5|Q03519|Q9Y3Z3|P80217
44419	6.9778e-13	1.9328e-10	16	327	64	14306	interspecies interaction between organisms	P52630|Q9BYX4|Q14258|P28065|P28062|P29590|Q9C035|P19525|P42224|Q8IYM9|Q92692|P05161|Q9HB58|P40306|Q03518|Q03519
51707	3.558e-11	7.3918e-09	15	357	64	14306	response to other organism	P52630|Q9BYX4|O15162|O95786|Q14258|Q16666|Q8WXG1|Q9C035|P19525|P42224|Q8IYM9|P05161|Q96AZ6|Q9Y3Z3|P80217
9607	8.1985e-10	1.3626e-07	15	447	64	14306	response to biotic stimulus	P52630|Q9BYX4|O15162|O95786|Q14258|Q16666|Q8WXG1|Q9C035|P19525|P42224|Q8IYM9|P05161|Q96AZ6|Q9Y3Z3|P80217
2376	1.6922e-08	2.3437e-06	19	948	64	14306	immune system process	Q9BYX4|Q15646|O95786|Q14258|Q16666|Q8WXG1|P13747|P50591|P28065|Q9Y6K5|P29590|Q8IYM9|Q9NZQ7|P40306|Q03518|Q03519|Q9Y3Z3|Q9Y5A7|P80217
6955	4.4913e-07	5.3318e-05	14	619	64	14306	immune response	Q9BYX4|Q15646|O95786|Q14258|Q8WXG1|P13747|P50591|Q9Y6K5|Q8IYM9|Q9NZQ7|P40306|Q9Y3Z3|Q9Y5A7|P80217
51436	8.1268e-06	0.00076664	5	62	64	14306	negative regulation of ubiquitin-protein ligase activity involved in mitotic cell cycle	Q9UL46|P28065|P28062|P40306|Q06323
31145	8.7971e-06	0.00076664	5	63	64	14306	anaphase-promoting complex-dependent proteasomal ubiquitin-dependent protein catabolic process	Q9UL46|P28065|P28062|P40306|Q06323
51437	9.5099e-06	0.00076664	5	64	64	14306	positive regulation of ubiquitin-protein ligase activity involved in mitotic cell cycle	Q9UL46|P28065|P28062|P40306|Q06323
51352	1.1071e-05	0.00076664	5	66	64	14306	negative regulation of ligase activity	Q9UL46|P28065|P28062|P40306|Q06323
51444	1.1071e-05	0.00076664	5	66	64	14306	negative regulation of ubiquitin-protein ligase activity	Q9UL46|P28065|P28062|P40306|Q06323
51439	1.2824e-05	0.00081977	5	68	64	14306	regulation of ubiquitin-protein ligase activity involved in mitotic cell cycle	Q9UL46|P28065|P28062|P40306|Q06323
51443	1.4788e-05	0.00087777	5	70	64	14306	positive regulation of ubiquitin-protein ligase activity	Q9UL46|P28065|P28062|P40306|Q06323
51351	1.8164e-05	0.0010063	5	73	64	14306	positive regulation of ligase activity	Q9UL46|P28065|P28062|P40306|Q06323
46967	1.9702e-05	0.0010233	2	2	64	14306	cytosol to ER transport	Q03518|Q03519
44265	2.387e-05	0.0011586	10	441	64	14306	cellular macromolecule catabolic process	Q8IZH2|Q9UL46|P28065|P05161|P28062|Q96AZ6|P40306|Q06323|Q8TCS8|Q9Y5A7
31397	2.5095e-05	0.0011586	5	78	64	14306	negative regulation of protein ubiquitination	Q9UL46|P28065|P28062|P40306|Q06323
32269	2.8803e-05	0.0012525	7	199	64	14306	negative regulation of cellular protein metabolic process	Q9UL46|P28065|P28062|P19474|P29590|P40306|Q06323
51438	3.0145e-05	0.0012525	5	81	64	14306	regulation of ubiquitin-protein ligase activity	Q9UL46|P28065|P28062|P40306|Q06323
31400	3.2842e-05	0.0012996	6	137	64	14306	negative regulation of protein modification process	Q9UL46|P28065|P28062|P19474|P40306|Q06323
51340	3.595e-05	0.0013579	5	84	64	14306	regulation of ligase activity	Q9UL46|P28065|P28062|P40306|Q06323
51248	4.3147e-05	0.0015589	7	212	64	14306	negative regulation of protein metabolic process	Q9UL46|P28065|P28062|P19474|P29590|P40306|Q06323
70206	4.5874e-05	0.0015884	3	16	64	14306	protein trimerization	Q8IYM9|P19474|Q9C035
2474	5.5526e-05	0.0018457	3	17	64	14306	antigen processing and presentation of peptide antigen via MHC class I	P13747|Q03518|Q03519
31398	6.4972e-05	0.0020766	5	95	64	14306	positive regulation of protein ubiquitination	Q9UL46|P28065|P28062|P40306|Q06323
9057	7.2566e-05	0.0022334	10	503	64	14306	macromolecule catabolic process	Q8IZH2|Q9UL46|P28065|P05161|P28062|Q96AZ6|P40306|Q06323|Q8TCS8|Q9Y5A7
51708	0.00011753	0.0031506	2	4	64	14306	intracellular protein transport in other organism involved in symbiotic interaction	Q03518|Q03519
19060	0.00011753	0.0031506	2	4	64	14306	intracellular transport of viral proteins in host cell	Q03518|Q03519
46719	0.00011753	0.0031506	2	4	64	14306	regulation of viral protein levels in host cell	Q03518|Q03519
30581	0.00011753	0.0031506	2	4	64	14306	symbiont intracellular protein transport in host	Q03518|Q03519
19882	0.00014719	0.0038223	4	60	64	14306	antigen processing and presentation	P13747|P28065|Q03518|Q03519
48002	0.00018307	0.00461	3	25	64	14306	antigen processing and presentation of peptide antigen	P13747|Q03518|Q03519
2230	0.00019532	0.0047738	2	5	64	14306	positive regulation of defense response to virus by host	O95786|P29590
31396	0.00020391	0.0048413	5	121	64	14306	regulation of protein ubiquitination	Q9UL46|P28065|P28062|P40306|Q06323
43632	0.00025525	0.0057328	7	282	64	14306	modification-dependent macromolecule catabolic process	Q9UL46|P28065|P05161|P28062|P40306|Q06323|Q9Y5A7
19941	0.00025525	0.0057328	7	282	64	14306	modification-dependent protein catabolic process	Q9UL46|P28065|P05161|P28062|P40306|Q06323|Q9Y5A7
2483	0.00029213	0.0062247	2	6	64	14306	antigen processing and presentation of endogenous peptide antigen	Q03518|Q03519
19885	0.00029213	0.0062247	2	6	64	14306	antigen processing and presentation of endogenous peptide antigen via MHC class I	Q03518|Q03519
43161	0.00038776	0.0078592	5	139	64	14306	proteasomal ubiquitin-dependent protein catabolic process	Q9UL46|P28065|P28062|P40306|Q06323
10498	0.00038776	0.0078592	5	139	64	14306	proteasomal protein catabolic process	Q9UL46|P28065|P28062|P40306|Q06323
51603	0.0004609	0.0091193	7	311	64	14306	proteolysis involved in cellular protein catabolic process	Q9UL46|P28065|P05161|P28062|P40306|Q06323|Q9Y5A7
44257	0.00048812	0.0094332	7	314	64	14306	cellular protein catabolic process	Q9UL46|P28065|P05161|P28062|P40306|Q06323|Q9Y5A7
7259	0.0005046	0.00953	3	35	64	14306	JAK-STAT cascade	P52630|P42224|Q13287
19883	0.00054217	0.0099127	2	8	64	14306	antigen processing and presentation of endogenous antigen	Q03518|Q03519
2831	0.00054872	0.0099127	3	36	64	14306	regulation of response to biotic stimulus	O95786|Q92692|P29590
31401	0.00056994	0.0099816	6	231	64	14306	positive regulation of protein modification process	Q9UL46|P28065|P28062|P29590|P40306|Q06323
2682	0.00057656	0.0099816	8	424	64	14306	regulation of immune system process	O95786|Q92692|Q9Y6U3|Q08722|P29590|Q9NZQ7|Q03518|Q9Y3Z3
44248	0.00059253	0.010049	11	776	64	14306	cellular catabolic process	Q8IZH2|Q9UL46|P28065|P05161|P28062|P09543|Q96AZ6|P40306|Q06323|Q8TCS8|Q9Y5A7
50691	0.00069507	0.011335	2	9	64	14306	regulation of defense response to virus by host	O95786|P29590
51701	0.00069566	0.011335	3	39	64	14306	interaction with host	Q92692|Q03518|Q03519
31347	0.00075734	0.01205	5	161	64	14306	regulation of defense response	O95786|Q92692|P29590|Q03518|Q9Y3Z3
30163	0.00076854	0.01205	7	339	64	14306	protein catabolic process	Q9UL46|P28065|P05161|P28062|P40306|Q06323|Q9Y5A7
50896	0.00104	0.016005	28	3633	64	14306	response to stimulus	P52630|Q9BYX4|O15162|Q16666|Q8WXG1|P13747|P50591|Q9Y6K5|P29590|P19971|Q9C035|P19525|P42224|Q9NZQ7|Q96AZ6|P40306|Q13287|Q9BQE5|Q9Y3Z3|Q9Y5A7|Q15646|O95786|Q14258|Q8IYM9|P05161|P09543|Q03518|P80217
31399	0.0012014	0.018153	7	366	64	14306	regulation of protein modification process	Q9UL46|P28065|P28062|P19474|P29590|P40306|Q06323
2697	0.0012416	0.018424	4	105	64	14306	regulation of immune effector process	O95786|Q92692|P29590|Q03518
6511	0.0014607	0.021295	6	277	64	14306	ubiquitin-dependent protein catabolic process	Q9UL46|P28065|P28062|P40306|Q06323|Q9Y5A7
6952	0.0016626	0.023821	9	620	64	14306	defense response	Q9BYX4|O95786|Q14258|Q8WXG1|Q13287|Q03518|Q9BQE5|Q9Y3Z3|Q9Y5A7
32270	0.0018433	0.025962	6	290	64	14306	positive regulation of cellular protein metabolic process	Q9UL46|P28065|P28062|P29590|P40306|Q06323
42771	0.0019925	0.027232	2	15	64	14306	DNA damage response, signal transduction by p53 class mediator resulting in induction of apoptosis	Q16666|P29590
44403	0.001999	0.027232	3	56	64	14306	symbiosis, encompassing mutualism through parasitism	Q92692|Q03518|Q03519
7009	0.0022706	0.030433	2	16	64	14306	plasma membrane organization	O15162|O00468
45088	0.0024366	0.031854	3	60	64	14306	regulation of innate immune response	Q92692|Q03518|Q9Y3Z3
51247	0.0024532	0.031854	6	307	64	14306	positive regulation of protein metabolic process	Q9UL46|P28065|P28062|P29590|P40306|Q06323
22415	0.0025545	0.032658	3	61	64	14306	viral reproductive process	Q92692|Q03518|Q03519
2715	0.0028784	0.0357	2	18	64	14306	regulation of natural killer cell mediated immunity	Q92692|Q03518
42269	0.0028784	0.0357	2	18	64	14306	regulation of natural killer cell mediated cytotoxicity	Q92692|Q03518
6891	0.0032077	0.0392	2	19	64	14306	intra-Golgi vesicle-mediated transport	Q96CV9|P54920
16032	0.003479	0.041899	3	68	64	14306	viral reproduction	Q92692|Q03518|Q03519
19048	0.0039167	0.044257	2	21	64	14306	virus-host interaction	Q03518|Q03519
50688	0.0039167	0.044257	2	21	64	14306	regulation of defense response to virus	O95786|P29590
50776	0.0039763	0.044257	5	235	64	14306	regulation of immune response	O95786|Q92692|P29590|Q03518|Q9Y3Z3
6401	0.004088	0.044257	3	72	64	14306	RNA catabolic process	Q8IZH2|Q96AZ6|Q8TCS8
51607	0.004296	0.044257	2	22	64	14306	defense response to virus	Q8WXG1|Q9Y3Z3
32938	0.0044736	0.044257	1	1	64	14306	negative regulation of translation in response to oxidative stress	P29590
8582	0.0044736	0.044257	1	1	64	14306	regulation of synaptic growth at neuromuscular junction	O00468
2476	0.0044736	0.044257	1	1	64	14306	antigen processing and presentation of endogenous peptide antigen via MHC class Ib	Q03519
2488	0.0044736	0.044257	1	1	64	14306	antigen processing and presentation of endogenous peptide antigen via MHC class Ib via ER pathway	Q03519
2489	0.0044736	0.044257	1	1	64	14306	antigen processing and presentation of endogenous peptide antigen via MHC class Ib via ER pathway, TAP-dependent	Q03519
43556	0.0044736	0.044257	1	1	64	14306	regulation of translation in response to oxidative stress	P29590
19063	0.0044736	0.044257	1	1	64	14306	virion penetration into host cell	Q92692
19064	0.0044736	0.044257	1	1	64	14306	viral envelope fusion with host membrane	Q92692
42270	0.0044736	0.044257	1	1	64	14306	protection from natural killer cell mediated cytotoxicity	Q03518
46814	0.0044736	0.044257	1	1	64	14306	virion attachment, binding of host cell surface coreceptor	Q92692
9056	0.004675	0.045705	11	1006	64	14306	catabolic process	Q8IZH2|Q9UL46|P28065|P05161|P28062|P09543|Q96AZ6|P40306|Q06323|Q8TCS8|Q9Y5A7
6508	0.004957	0.047899	9	730	64	14306	proteolysis	Q9UL46|P28065|P05161|P28062|P28838|P40306|Q06323|Q9Y5A7|Q99538
1910	0.0051035	0.048747	2	24	64	14306	regulation of leukocyte mediated cytotoxicity	Q92692|Q03518
[truncated: 30 more columns]
